# Supplementary material for: Confinement induced change of microemulsion phase structure in controlled pore glass (CPG) monoliths
Source: Royal Society of Chemistry journal article supplement (doi:10.1039/d4ra04090b), 2024-01-01
Supplement: d4ra04090b1.pdf [file d4ra04090b1.pdf]

## Supporting Information

### Confinement Induced Change of Microemulsion Phase Structure in Controlled Pore Glass (CPG) Monoliths

Margarethe Dahl,<sup>a</sup> Cedric J. Gommès,<sup>b</sup> René Haverkamp,<sup>c</sup> Kathleen Wood,<sup>d</sup> Sylvain Prévost,<sup>e</sup> Pierre Schröer,<sup>a</sup> Tomáš Omasta,<sup>a</sup> Tim Julian Stank,<sup>c</sup> Thomas Hellweg,<sup>c</sup> and Stefan Wellert<sup>a</sup>

---

<sup>a</sup> Department of Chemistry, Technische Universität Berlin, Straße des 17. Juni 124, 10623 Berlin, Germany. E-mail: s.wellert@tu-berlin.de

<sup>b</sup> Department of Chemical Engineering, University of Liège B6 A, 3 allée du 6 aout, B-4000 Liège, Belgium.

<sup>c</sup> Department of Physical and Biophysical Chemistry, University of Bielefeld, Universitätsstraße 25, 33615 Bielefeld, Germany.

<sup>d</sup> Australian Nuclear and Technology Organisation, New Illawara Rd, Lucas Heights, NSW 2234, Australia

<sup>e</sup> Institute Laue-Langevin, 71 avenue des Martyrs, F-38042 Grenoble, France.

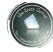

Mercury Intrusion Measurements

a

|                       |       |                                 |
|-----------------------|-------|---------------------------------|
| Modal Diameter        | 7,8   | nm                              |
| Median Diameter (50%) | 7,0   | nm                              |
| Porosity              | 20,1  | %                               |
| Pore Volume           | 0,110 | cm <sup>3</sup> g <sup>-1</sup> |

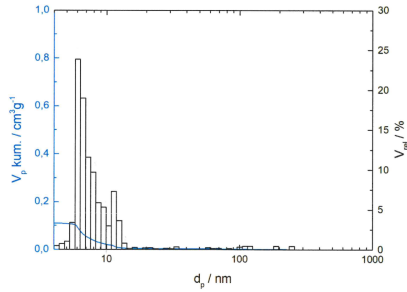

Leipzig, 08.11.2022:

*Bastian Oberleiter*  
Bastian Oberleiter

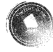

Mercury Intrusion Measurements

c

|                       |       |                                 |
|-----------------------|-------|---------------------------------|
| Modal Diameter        | 69,7  | nm                              |
| Median Diameter (50%) | 69,1  | nm                              |
| Porosity              | 37,7  | %                               |
| Pore Volume           | 0,275 | cm <sup>3</sup> g <sup>-1</sup> |

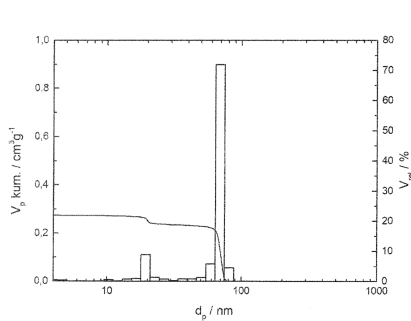

Leipzig, 02.05.2023:

*Bastian Oberleiter*  
Dr. Bastian Oberleiter

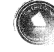

Mercury Intrusion Measurements

b

|                       |       |                                 |
|-----------------------|-------|---------------------------------|
| Modal Diameter        | 16,2  | nm                              |
| Median Diameter (50%) | 16,4  | nm                              |
| Porosity              | 31,4  | %                               |
| Pore Volume           | 0,208 | cm <sup>3</sup> g <sup>-1</sup> |

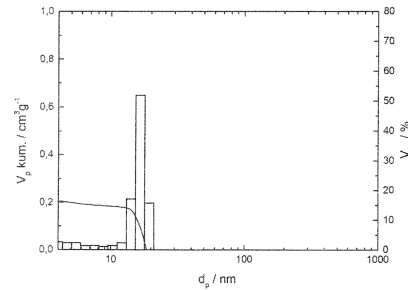

Leipzig, 02.05.2023:

*Bastian Oberleiter*  
Dr. Bastian Oberleiter

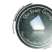

Mercury Intrusion Measurements

d

|                       |       |                                 |
|-----------------------|-------|---------------------------------|
| Modal Diameter        | 132,8 | nm                              |
| Median Diameter (50%) | 133,0 | nm                              |
| Porosity              | 44,4  | %                               |
| Pore Volume           | 0,363 | cm <sup>3</sup> g <sup>-1</sup> |

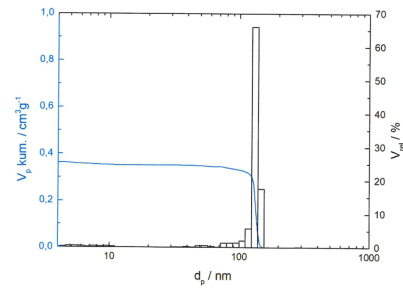

Leipzig, 08.11.2022:

*Bastian Oberleiter*  
Bastian Oberleiter

Fig. S 1 Hg-intrusion certificates of the porous membranes CPG10, CPG20, CPG50 and CPG100 (a – d) from the supplier.

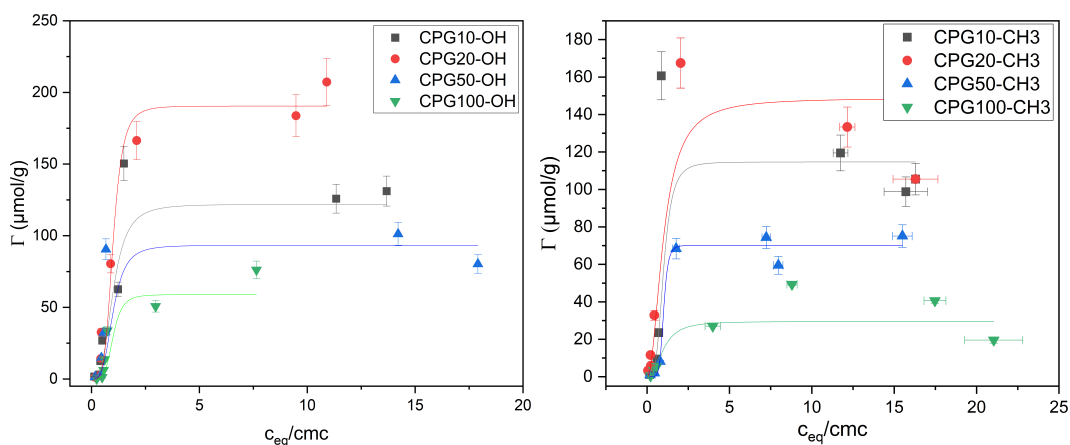

Fig. S 2 Adsorption Isotherms of the  $C_{10}E_4$  surfactant onto the hydrophilic CPG (left) and hydrophobic CPG (right) with the fit of the Gu-Zhu model.

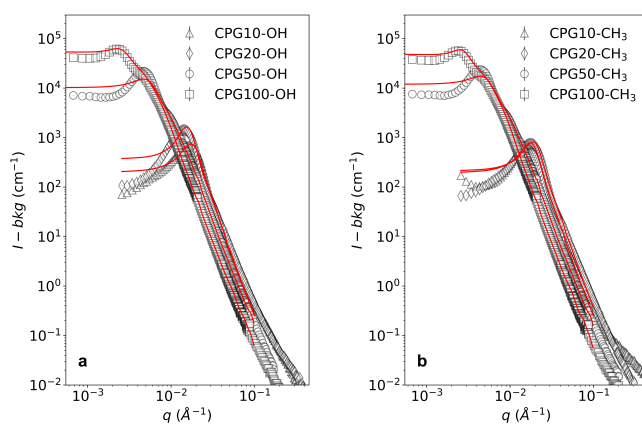

Fig. S 3 a) SANS signal of the air-filled hydrophilic CPG-OH and b) hydrophobic CPG-CH<sub>3</sub> after subtraction of the incoherent background with the TS fit taking multiple scattering into account (red line).

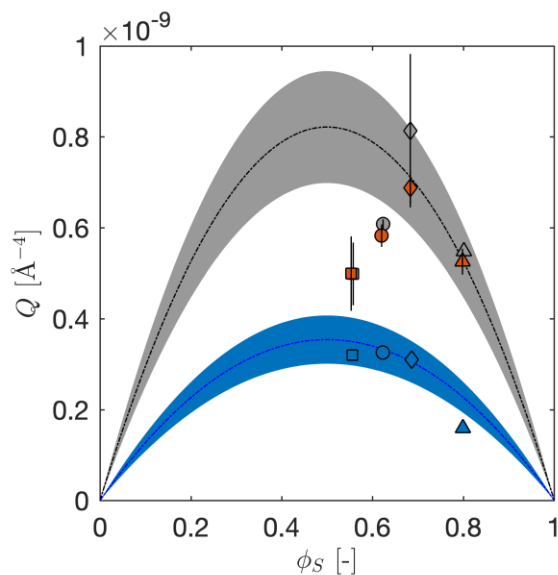

Fig. S 4 Integrated total scattering intensity  $Q_{exp}$  versus solid volume fraction  $\Phi_S$ . The blue symbols represent the  $D_2O$ -filled hydrophilic samples. The air-filled CPG-CH<sub>3</sub> is shown as red symbols and the air-filled CPG-OH is shown as gray symbols. The error bars are from experiments on different instruments.
